# Supplementary material for: Developing an Artificial Intelligence-Guided Signal Detection in the Food and Drug Administration Adverse Event Reporting System (FAERS): A Proof-of-Concept Study Using Galcanezumab and Simulated Data
Source: Springer Nature journal article supplement (doi:10.1007/s40264-023-01317-0), 2023-06-10
Supplement: MOESM1 [file 25472436]

**Developing an artificial intelligence-guided signal detection in the Food and Drug Administration Adverse Event Reporting System (FAERS): A proof-of-concept study using galcanezumab and simulated data.**

Fahed Al-Azzawi<sup>1</sup>, Israa Mahmoud<sup>1</sup>, François Haguinet<sup>2</sup>, Andrew Bate<sup>3,4,5</sup>, Maurizio Sessa<sup>1</sup>

<sup>1</sup> Department of Drug Design and Pharmacology, University of Copenhagen, Copenhagen, Denmark

<sup>2</sup> GSK, Wavre, Belgium

<sup>3</sup> GSK, London, UK

<sup>4</sup> London School of Hygiene and Tropical Medicine, University of London, London, UK

<sup>5</sup> New York University, New York, NY, USA

**Journal:** Drug Safety.

**Corresponding author**

Fahed Al-Azzawi, MPharm  
Department of Drug Design and Pharmacology,  
University of Copenhagen,  
Jagtvej 160 Copenhagen 2100, Denmark  
Email: kdz640@sund.ku.dk

## Electronic supplementary material 1

Version: 2023-01-23

```
#####  
Simulated data to validate the framework #  
#####  
#Libraries  
  
library(MASS)  
library(tidyverse)  
library(GGally)  
library(bindata)  
library(partykit)  
library(Publish)  
library(openxlsx)  
  
#####  
#####SCENARIO 1  
#####  
  
#Set seed for reproducibility  
set.seed(5)  
  
# create the variance covariance matrix  
sigma<-rbind(c(1,-0.8,0.7), c(-0.8,1, 0.9), c(0.7,-0.9,1))  
  
# create the mean vector  
mu<-c(40, 75, 2)  
  
# generate the multivariate normal distribution  
df<-as.data.frame(mvrnorm(n=1000, mu=mu, Sigma=sigma))  
  
df<-df%>%mutate(MyBinary = ifelse(V1>median(V1), 0 ,1))  
  
df<-df%>%mutate(MyNoisyBinary = ifelse(V1>median(V1), sample(c(0,1),n(), replace = TRUE, p=c(0.25, 0.75)) ,  
sample(c(0,1),n(), replace = TRUE, p=c(0.75, 0.25))))  
  
df<-df%>%mutate(MyBinary2 = ifelse(V2>median(V2), 1 ,0))  
  
# Construct a binary correlation matrix  
rho <- 0  
m <- matrix(c(1,rho,rho,1), ncol=2)  
  
# Simulate x-y pairs, and check that they have the specified correlation structure  
x <- rmvbin(1000, margprob = c(0.5, 0.5), bincorr = m)  
df2 <- as.data.frame(x)  
df$V4 <- df2$V1  
colnames(df) <- c("Age", "Weight", "N_co_reported_drugs", "Co_reported_drug_1", "Co_reported_drug_2",  
"Outcome", "Co_reported_drug_3")  
df$Caseid <- 1:1000  
  
#Correlation matrix  
ggpairs(df)
```

```

#Data management
df$Outcome <- factor(df$Outcome,levels=c("0","1"),labels=c("Control","Galcanezumab"))
df$Co_reported_drug_1 <- factor(df$Co_reported_drug_1,levels=c("0","1"),labels=c("No","Yes"))
df$Co_reported_drug_2 <- factor(df$Co_reported_drug_2,levels=c("0","1"),labels=c("No","Yes"))
df$Co_reported_drug_3 <- factor(df$Co_reported_drug_3,levels=c("0","1"),labels=c("No","Yes"))

colnames(df)

## [1] "Age"          "Weight"       "N_co_reported_drugs"
## [4] "Co_reported_drug_1" "Co_reported_drug_2" "Outcome"
## [7] "Co_reported_drug_3" "Caseid"

df$N_co_reported_drugs <- round(df$N_co_reported_drugs)
df$Age <- round(df$Age)
df$Weight <- round(df$Weight)

#Descriptive table
table1 <- summary(univariateTable(Outcome ~ Age +
Weight+N_co_reported_drugs+Co_reported_drug_1+Co_reported_drug_2+Co_reported_drug_3, data=df))

#Conditional inference tree
tree <- partykit::ctree(Outcome ~ Co_reported_drug_1+Co_reported_drug_2+Co_reported_drug_3, data=df)
plot(tree)

#####
#####SCENARIO 2
#####

#Set seed for reproducibility
set.seed(5)

# create the variance covariance matrix
sigma<-rbind(c(1,-0.8,0.7), c(-0.8,1, 0.9), c(0.7,-0.9,1))

# create the mean vector
mu<-c(40, 75, 2)

# generate the multivariate normal distribution
df<-as.data.frame(mvnorm(n=50, mu=mu, Sigma=sigma))

df<-df%>%mutate(MyBinary = ifelse(V1>median(V1), 0 ,1))

df<-df%>%mutate(MyNoisyBinary = ifelse(V1>median(V1), sample(c(0,1),n(), replace = TRUE, p=c(0.25, 0.75)),
sample(c(0,1),n(), replace = TRUE, p=c(0.75, 0.25))))

df<-df%>%mutate(MyBinary2 = ifelse(V2>median(V2), 1 ,0))

# Construct a binary correlation matrix
rho <- 0
m <- matrix(c(1,rho,rho,1), ncol=2)

# Simulate x-y pairs, and check that they have the specified correlation structure
x <- rmvbin(50, margprob = c(0.5, 0.5), bincorr = m)
df2 <- as.data.frame(x)
df$V4 <- df2$V1

```

```

colnames(df) <- c("Age", "Weight", "N_co_reported_drugs", "Co_reported_drug_1", "Co_reported_drug_2",
"Outcome", "Co_reported_drug_3")
df$Caseid <- 1:50

#Correlation plot
ggpairs(df)

df$Outcome <- factor(df$Outcome,levels=c("0","1"),labels=c("Control","Galcanzumab"))
df$Co_reported_drug_1 <- factor(df$Co_reported_drug_1,levels=c("0","1"),labels=c("No","Yes"))
df$Co_reported_drug_2 <- factor(df$Co_reported_drug_2,levels=c("0","1"),labels=c("No","Yes"))
df$Co_reported_drug_3 <- factor(df$Co_reported_drug_3,levels=c("0","1"),labels=c("No","Yes"))

colnames(df)

## [1] "Age"          "Weight"       "N_co_reported_drugs"
## [4] "Co_reported_drug_1" "Co_reported_drug_2" "Outcome"
## [7] "Co_reported_drug_3" "Caseid"

df$N_co_reported_drugs <- round(df$N_co_reported_drugs)
df$Age <- round(df$Age)
df$Weight <- round(df$Weight)

#Descriptive table
table1 <- summary(univariateTable(Outcome ~ Age +
Weight+N_co_reported_drugs+Co_reported_drug_1+Co_reported_drug_2+Co_reported_drug_3, data=df))

#Conditional inference tree
tree <- partykit::ctree(Outcome ~ Co_reported_drug_1+Co_reported_drug_2+Co_reported_drug_3, data=df)
plot(tree)

#####
#####SCENARIO 3
#####

#Set seed for reproducibility
set.seed(5)

# create the variance covariance matrix
sigma<-rbind(c(1,-0.8,0.7), c(-0.8,1, 0.9), c(0.7,-0.9,1))

# create the mean vector
mu<-c(40, 75, 2)

# generate the multivariate normal distribution
df<-as.data.frame(mvrnorm(n=1000, mu=mu, Sigma=sigma))

df<-df%>%mutate(MyBinary = ifelse(V1>median(V1), 0 ,1))

df<-df%>%mutate(MyNoisyBinary = ifelse(V1>median(V1), sample(c(0,1),n(), replace = TRUE, p=c(0.25, 0.75)),
sample(c(0,1),n(), replace = TRUE, p=c(0.55, 0.45))))

df<-df%>%mutate(MyBinary2 = ifelse(V2>median(V2), 1 ,0))

# Construct a binary correlation matrix
rho <- 0

```

```

m <- matrix(c(1,rho,rho,1), ncol=2)

# Simulate x-y pairs, and check that they have the specified correlation structure
x <- rmvbin(1000, margprob = c(0.5, 0.5), bincorr = m)
df2 <- as.data.frame(x)

df$V4 <- df2$V1
colnames(df) <- c("Age", "Weight", "N_co_reported_drugs", "Co_reported_drug_1", "Co_reported_drug_2",
"Outcome", "Co_reported_drug_3")
df$Caseid <- 1:1000

ggpairs(df)

df$Outcome <- factor(df$Outcome,levels=c("0","1"),labels=c("Control","Galcanezumab"))
df$Co_reported_drug_1 <- factor(df$Co_reported_drug_1,levels=c("0","1"),labels=c("No","Yes"))
df$Co_reported_drug_2 <- factor(df$Co_reported_drug_2,levels=c("0","1"),labels=c("No","Yes"))
df$Co_reported_drug_3 <- factor(df$Co_reported_drug_3,levels=c("0","1"),labels=c("No","Yes"))

colnames(df)

## [1] "Age"          "Weight"        "N_co_reported_drugs"
## [4] "Co_reported_drug_1" "Co_reported_drug_2" "Outcome"
## [7] "Co_reported_drug_3" "Caseid"

df$N_co_reported_drugs <- round(df$N_co_reported_drugs)
df$Age <- round(df$Age)
df$Weight <- round(df$Weight)

df <- df[,-4]

#Descriptive table
table1 <- summary(univariateTable(Outcome ~ Age +
Weight+N_co_reported_drugs+Co_reported_drug_2+Co_reported_drug_3, data=df))

#Conditional inference tree
tree <- partykit::ctree(Outcome ~ Co_reported_drug_2+Co_reported_drug_3, data=df)
plot(tree)

#####
#   END   #
#####

```
