# Supplementary material for: Developing an Artificial Intelligence-Guided Signal Detection in the Food and Drug Administration Adverse Event Reporting System (FAERS): A Proof-of-Concept Study Using Galcanezumab and Simulated Data
Source: Springer Nature journal article supplement (doi:10.1007/s40264-023-01317-0), 2023-06-10
Supplement: MOESM2 [file 25472436]

**Developing an artificial intelligence-guided signal detection in the Food and Drug Administration Adverse Event Reporting System (FAERS): A proof-of-concept study using galcanezumab and simulated data.**

Fahed Al-Azzawi<sup>1</sup>, Israa Mahmoud<sup>1</sup>, François Haguinet<sup>2</sup>, Andrew Bate<sup>3,4,5</sup>, Maurizio Sessa<sup>1</sup>

<sup>1</sup> Department of Drug Design and Pharmacology, University of Copenhagen, Copenhagen, Denmark

<sup>2</sup> GSK, Wavre, Belgium

<sup>3</sup> GSK, London, UK

<sup>4</sup> London School of Hygiene and Tropical Medicine, University of London, London, UK

<sup>5</sup> New York University, New York, NY, USA

**Journal:** Drug Safety.

**Corresponding author**

Fahed Al-Azzawi, MPharm  
Department of Drug Design and Pharmacology,  
University of Copenhagen,  
Jagtvej 160 Copenhagen 2100, Denmark  
Email: kdz640@sund.ku.dk

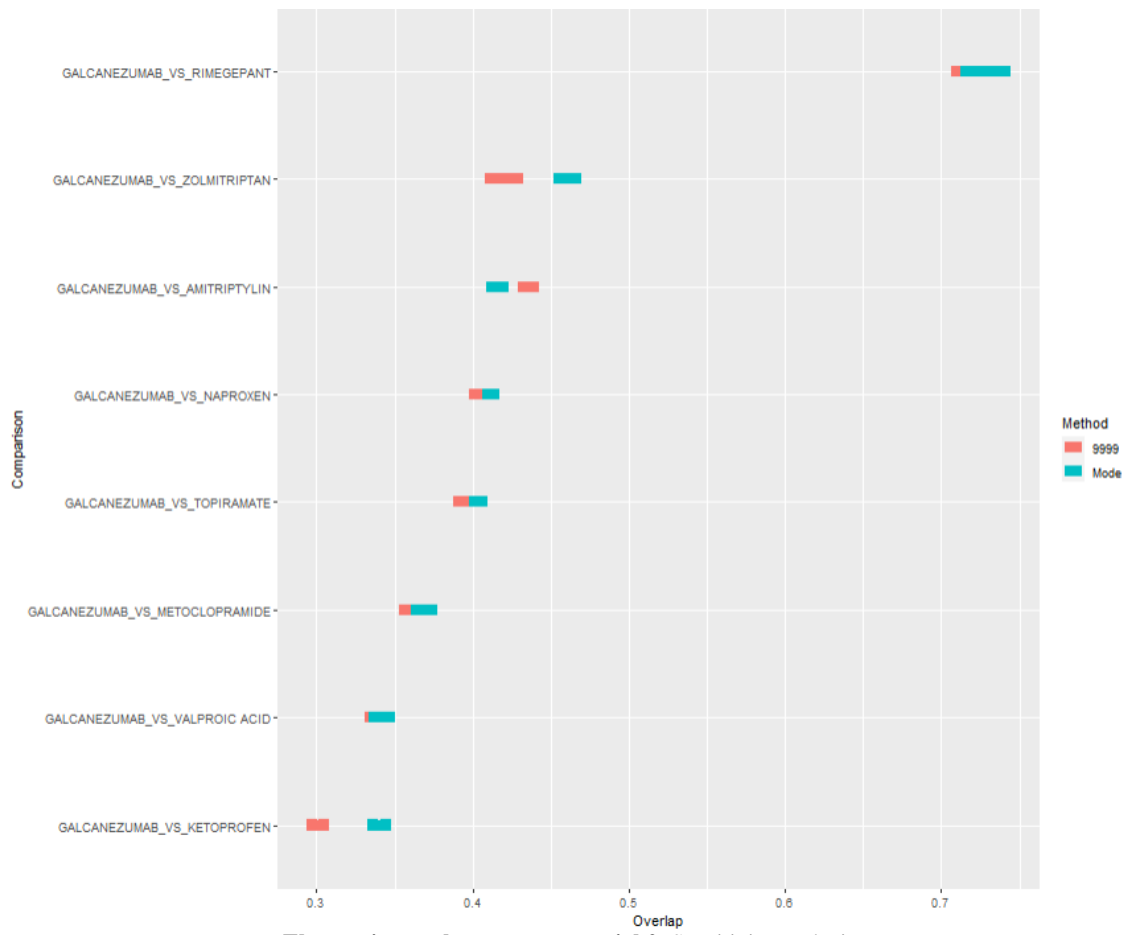

Electronic supplementary material 2. Sensitivity analysis.
